# Supplementary material for: Comparison of ZrO2 Particles and Polyaniline as Additives in Polystyrene-Based Sorbents for the Micro-Solid Phase Extraction of Psychoactive Drugs from Biofluids
Source: MDPI journal article supplement (doi:10.3390/molecules29040761), 2024-02-07
Supplement: s1 [file s1]

# Comparison of ZrO<sub>2</sub> particles and polyaniline as additives in polystyrene-based sorbents for the micro-solid phase extraction of psychoactive drugs from biofluids

Paweł Stelmaszczyk <sup>1,2</sup>, Mateusz Iwan <sup>1</sup>, Dominika Pawcenis <sup>3</sup> and Renata Wietecha-Postuszny <sup>1,\*</sup>

<sup>1</sup> Laboratory for Forensic Chemistry, Department of Analytical Chemistry, Faculty of Chemistry, Jagiellonian University in Kraków, Gronostajowa St. 2, 30-387 Kraków, Poland; pawel.stelmaszczyk@doctoral.uj.edu.pl (P.S.); mateusz.iwan@alumni.uj.edu.pl (M.I.)

<sup>2</sup> Doctoral School of Exact and Natural Sciences, Faculty of Chemistry, Jagiellonian University in Kraków, Gronostajowa St. 2, 30-387 Kraków, Poland

<sup>3</sup> Faculty of Chemistry, Jagiellonian University in Kraków, Gronostajowa St. 2, 30-387 Kraków, Poland; pawcenis@chemia.uj.edu.pl

\* Correspondence: wietecha@chemia.uj.edu.pl or renata.wietecha-posluszny@uj.edu.pl

**Keywords:** electrospun fibers, solid phase microextraction, sorbents, polystyrene, psychoactive substances

## Table of contents:

1. XRD pattern and SEM image of synthesized ZrO<sub>2</sub> particles
2. Calculated diameter of synthesized ZrO<sub>2</sub> particles based on the XRD pattern

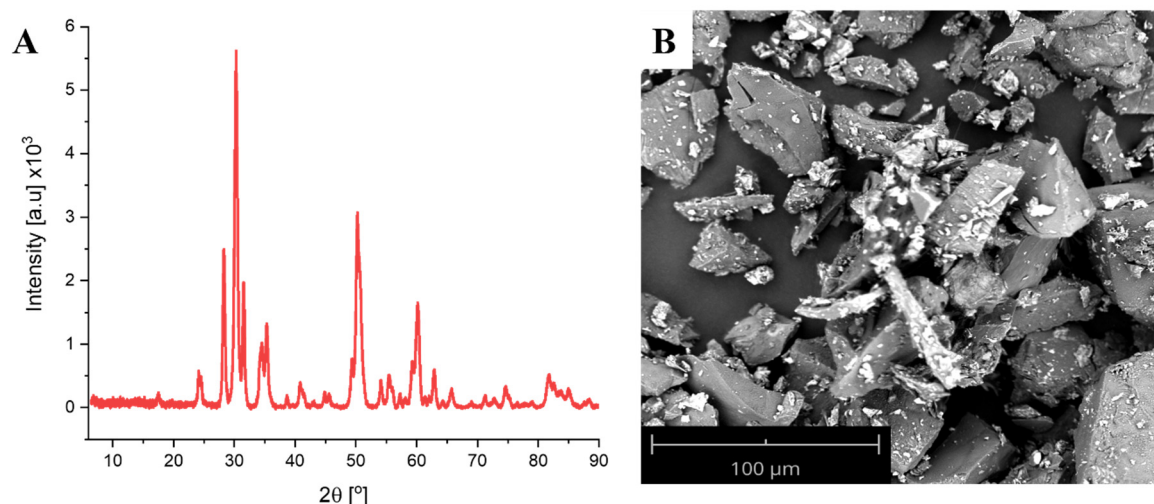

**Figure S1.** A – XRD pattern ( $\lambda = 1.5405$  Å, Bragg-Brentano geometry,  $2\theta$  range: 5-90°) of synthesized ZrO<sub>2</sub> particles; B – SEM image of obtained ZrO<sub>2</sub> particles. Both XRD pattern and SEM image were obtained for ZrO<sub>2</sub> particles before calcination or washing with HNO<sub>3</sub>.

**Table S1.** The calculated diameter of synthesized ZrO<sub>2</sub> particles based on the XRD pattern and Scherrer equation.

| <b>2<math>\theta</math> (°)</b> | <b><math>\theta</math> (°)</b> | <b><i>B</i> (rad)</b> | <b><i>D<sub>hkl</sub></i> (nm)</b> |
|---------------------------------|--------------------------------|-----------------------|------------------------------------|
| 28.2                            | 14.1                           | 0.006801              | 21.02                              |
| 30.3                            | 15.1                           | 0.009339              | 15.38                              |
| 31.5                            | 15.8                           | 0.006840              | 21.06                              |
| 34.5                            | 17.3                           | 0.014770              | 9.83                               |
| 35.3                            | 17.7                           | 0.009145              | 15.91                              |
| 50.3                            | 25.1                           | 0.015330              | 9.99                               |
| 60.1                            | 30.1                           | 0.011830              | 13.54                              |
